# Supplementary material for: Nicotine Population Pharmacokinetics in Healthy Smokers After Intravenous, Oral, Buccal and Transdermal Administration
Source: Springer Nature journal article supplement (doi:10.1007/s40262-020-00960-5), 2020-12-23
Supplement: MOESM8 [file 18709626]

## Electronic Supplementary Material

**Article title:** Nicotine population pharmacokinetics in healthy smokers after intravenous, oral, buccal and transdermal administration

**Journal name:** Clinical Pharmacokinetics

**Authors:** Per O Olsson Gisleskog<sup>1</sup>, Juan José Perez Ruixo<sup>2</sup>, Åke Westin<sup>3</sup>, Anna C Hansson<sup>4</sup>, Paul A Soons<sup>5\*</sup>

### **Affiliation:**

<sup>1</sup>SGS Exprimo NV, Life Science Services, London, UK (currently at POG Pharmacometrics, London, UK)

<sup>2</sup>Janssen Research & Development, Quantitative Sciences, Beerse, Belgium

<sup>3</sup>McNeil AB, Global Medical Affairs and Clinical Research, Helsingborg, Sweden

<sup>4</sup>McNeil AB, Clinical Science, Helsingborg, Sweden

<sup>5</sup>Janssen Pharmaceutica NV, Alliance Management, Beerse, Belgium

**Email address corresponding author:** [psoons@its.inj.com](mailto:psoons@its.inj.com)

## Details on study designs, dosing regimens and sampling schedules

| Study Name<br>(EudraCT<br>identifier, where<br>available) | Route<br>Formulation        | Study<br>description                                       | Treatment arms                                                                                                                                                 | Number of<br>subjects<br>included in<br>analysis | PK sampling schedule                                                                                                        | Ethics Committee                              |
|-----------------------------------------------------------|-----------------------------|------------------------------------------------------------|----------------------------------------------------------------------------------------------------------------------------------------------------------------|--------------------------------------------------|-----------------------------------------------------------------------------------------------------------------------------|-----------------------------------------------|
| 96NNIV003                                                 | iv                          | Effect of Hepatic<br>Impairment<br>Parallel single<br>dose | iv 0.028mg/kg /10min                                                                                                                                           | 8 <sup>a</sup>                                   | -24, -20, -16, -12,<br>predose, 0.083, 0.167,<br>0.333, 0.5, 0.75, 1, 1.5,<br>2, 3, 4, 5, 6, 8, 10, 12,<br>24h after dosing | University of Lund,<br>Lund, Sweden           |
| 96NNIV004                                                 | iv                          | Effect of Age<br>Parallel single<br>dose                   | iv 0.028mg/kg /10min                                                                                                                                           | 40                                               | -20, -16, -12, predose,<br>0.083, 0.167, 0.333,<br>0.5, 0.75, 1, 1.5, 2, 3, 4,<br>5, 6, 8, 10, 12, 23h after<br>dosing      | University of Lund,<br>Lund, Sweden           |
| 96NNIV005                                                 | iv                          | Effect of Renal<br>Impairment<br>Parallel single<br>dose   | iv 0.028mg/kg /10min                                                                                                                                           | 9 <sup>b</sup>                                   | -24, -20, -16, -12,<br>predose, 0.083, 0.167,<br>0.333, 0.5, 0.75, 1, 1.5,<br>2, 3, 4, 5, 6, 8, 10, 12,<br>24h after dosing | University of Linköping,<br>Linköping, Sweden |
| 980CHC1050004                                             | iv<br>Buccal<br>Chewing gum | Absolute<br>bioavailability<br>Cross-over single<br>dose   | iv 0.028mg/kg /10min<br>Nicorette freshmint<br>gum 4mg                                                                                                         | 23                                               | predose, 0.033, 0.067,<br>0.1 0.083, 0.167, 0.333,<br>0.5, 0.75, 1, 1.5, 2, 3, 4,<br>5, 6, 8, 10, 12h after<br>dosing       | University of Lund,<br>Lund, Sweden           |
| A6431108<br>(2006-006486-16)                              | Transdermal                 | Comparative PK<br>Cross-over<br>repeat dose                | Nicorette Invisipatch<br>22.5cm2 (25mg/16h)<br>applied 16/24h for 3<br>days<br><br>Nicorette Invisipatch<br>22.5cm2 (25mg/16h)<br>applied 24/24h for 3<br>days | 26                                               | predose, 1, 2, 3, 4, 5, 6,<br>7, 8, 9, 10, 11, 12, 13,<br>14, 15, 16, 24h after<br>dosing on days 1 and 3.                  | University of Lund,<br>Lund, Sweden           |
| NICPAT9145003                                             | Transdermal                 | Comparative PK<br>Cross-over single<br>dose                | Nicorette patch10 cm2<br>(5mg/16h)<br><br>Nicorette patch 30 cm2<br>(15mg/16h)                                                                                 | 17                                               | predose, 1, 2, 3, 4, 6, 8,<br>10, 12, 14, 16, 17, 20,<br>22, 24, 26, 28h after<br>dosing                                    | University of Lund,<br>Lund, Sweden           |

|                              |                                      |                                                  |                                                                                                |    |                                                                                                              |                               |       |
|------------------------------|--------------------------------------|--------------------------------------------------|------------------------------------------------------------------------------------------------|----|--------------------------------------------------------------------------------------------------------------|-------------------------------|-------|
|                              |                                      |                                                  | Nicorette patch 50 cm2<br>(25mg/16h)                                                           |    |                                                                                                              |                               |       |
|                              |                                      |                                                  | Nicorette Invisipatch<br>10 cm2<br>(10mg/16h)                                                  |    |                                                                                                              |                               |       |
|                              |                                      |                                                  | Nicorette Invisipatch<br>22.5 cm2<br>(25mg/16h)                                                |    |                                                                                                              |                               |       |
|                              |                                      |                                                  | Nicorette Invisipatch<br>35 cm2<br>(37mg/16h)                                                  |    |                                                                                                              |                               |       |
| NICPAT9145004                | Transdermal                          | Bioequivalence<br>Cross-over single<br>dose      | Nicorette patch 50 cm2<br>(25mg/16h)                                                           | 30 | predose, 1, 2, 3, 4, 6, 8,<br>10, 12, 14, 16, 17, 20,<br>22, 24, 26, 28h after<br>dosing                     | University of<br>Lund, Sweden | Lund, |
|                              |                                      |                                                  | Nicorette Invisipatch<br>22.5 cm2<br>(25mg/16h)                                                |    |                                                                                                              |                               |       |
| 92NNBT005                    | Oral<br>Microtabs                    | Comparative PK<br>Cross-over, 10<br>hourly doses | 10 x 2mg sublingual<br>tablet chewed and<br>swallowed                                          | 20 | Predose samples for<br>doses 1-10; 10, 20, 30,<br>40, 50 and 60 min after<br>last dose.                      | University of<br>Lund, Sweden | Lund, |
| 93NNBT007                    | Oral<br>Microtabs                    | Single dose                                      | 3 x 2mg sublingual<br>tablet swallowed                                                         | 6  | Predose, 0.5, 0.75, 1,<br>1.5, 2, 3, 4, 5, 6, 7 and 8<br>h after dosing.                                     | University of<br>Lund, Sweden | Lund, |
| A6431075                     | Buccal<br>Chewing gum<br>Lozenge     | Comparative PK<br>Single dose<br>cross-over      | Nicorette classic gum<br>4mg<br>Nicorette freshmint<br>gum 4mg<br>NiQuitin lozenge 4mg         | 36 | Predose, 2.5, 5, 7.5, 10,<br>15, 20, 30, 45, 60, 75,<br>90, 105 min; 2, 3, 4, 6,<br>8, and 10 h after dosing | University of<br>Lund, Sweden | Lund, |
| A6431076<br>(2004-003016-30) | Buccal<br>Chewing gum                | Comparative PK<br>Single dose<br>cross-over      | Nicorette classic gum<br>2mg                                                                   | 19 | Predose, 2, 4, 6, 8, 10,<br>13, 16, 20, 30, 45, 60<br>min; 1.25, 1.5, 2, 4, 6,<br>and 8 h after dosing       | University of<br>Lund, Sweden | Lund, |
| A6431094<br>(2006-000160-81) | Buccal<br>Chewing gum<br>Mouth spray | Comparative PK<br>Single dose<br>cross-over      | Nicorette classic gum<br>2mg<br>Mouth Spray 2mg<br>buccally<br>Mouth spray 2mg<br>sublingually | 30 | Predose, 2, 4, 6, 8, 10,<br>13, 16, 20, 30, 45, 60<br>min; 1.25, 1.5, 2, 4, 6,<br>and 8 h after dosing       | University of<br>Lund, Sweden | Lund, |

|                                |                                                 |                                                                                  | Mouth spray 2mg<br>normal administration                                                                                                   |    |                                                                                                                                                                                                                               |                                                    |       |
|--------------------------------|-------------------------------------------------|----------------------------------------------------------------------------------|--------------------------------------------------------------------------------------------------------------------------------------------|----|-------------------------------------------------------------------------------------------------------------------------------------------------------------------------------------------------------------------------------|----------------------------------------------------|-------|
| A6431095<br>(2006-003335-75)   | Buccal<br>Chewing gum                           | Comparative PK<br>Single dose<br>cross-over                                      | Nicorette classic gum<br>2mg<br>Nicorette classic gum<br>4mg                                                                               | 36 | Predose, 5, 10, 15, 20,<br>30, 45, 60, 75, 90 min;<br>2, 3, 4, 6, 8, 10 and 12 h<br>after dosing                                                                                                                              | University of<br>Lund, Sweden                      | Lund, |
| A6431096<br>(2006-000552-40)   | Buccal<br>Chewing gum                           | Comparative PK<br>Cross-over, 12<br>hourly doses                                 | 12 x Nicorette classic<br>gum 2mg<br>12 x Nicorette classic<br>gum 4mg                                                                     | 35 | Predose samples for<br>doses 1-12. 10, 20, 30,<br>40, 50 and 60 min after<br>last dose                                                                                                                                        | University of<br>Lund, Sweden                      | Lund, |
| NICSOS9132005                  | Buccal<br>Chewing gum                           | Comparative PK<br>Single and<br>multiple dose<br>(12 hourly doses)<br>cross-over | Nicorette classic gum<br>4mg<br>Nicorette freshmint<br>gum 4mg<br>12 x Nicorette classic<br>gum 2mg<br>12 x Nicorette<br>freshmint gum 2mg | 26 | Single dose: pre-dose<br>and at 5, 10, 15, 20, 30,<br>45 min; 1, 1.25, 1.5, 2,<br>3, 4, 6, 8 and 10 h after<br>dosing.<br>Repeat dose: Predose<br>samples for doses 1-12;<br>10, 20, 30, 40, 50 and<br>60 min after last dose | University of<br>Gothenburg,<br>Gothenburg, Sweden | of    |
| NICSOS9132006                  | Buccal<br>Chewing gum                           | Comparative PK<br>Single and<br>multiple dose<br>(12 doses) cross-<br>over       | Nicorette freshmint<br>gum 4mg<br>12 x Nicorette<br>freshmint gum 2mg                                                                      | 32 | Single dose: predose<br>and 5, 10, 15, 20, 30, 45<br>min; 1, 1.25, 1.5, 2, 3, 4,<br>6, 8 and 10 h after<br>dosing<br>Repeat dose: Predose<br>samples for doses 1-12;<br>10, 20, 30, 40, 50 and<br>60 min after last dose      | University of<br>Lund, Sweden                      | Lund, |
| NICTDP1065<br>(2008-006280-36) | Buccal<br>Chewing gum<br>Mouth spray<br>Lozenge | Comparative PK<br>Single dose<br>cross-over                                      | Mouth spray 1mg<br>Mouth spray 2mg<br>Mouth spray 4mg<br>Nicorette classic gum<br>4mg<br>NiQuitin lozenge 4mg                              | 45 | Predose and 2, 4, 6, 8,<br>10, 15, 20, 30, 45, 60<br>min; 1.5, 2, 3, 4, 6, 8,<br>10, and 12 h after<br>dosing                                                                                                                 | University of<br>Lund, Sweden                      | Lund, |
| NICTDP1066<br>(2008-006279-65) | Buccal<br>Chewing gum<br>Mouth spray<br>Lozenge | Comparative PK<br>Cross-over,<br>repeated dosing<br>for 12h                      | Mouth spray 2mg<br>every h for 12h<br>Mouth spray 2mg<br>every 30 min for 12h<br>Nicorette classic gum<br>4mg every h for 12h              | 40 | Predose at 0, 1, 2, 4, 6,<br>8, 9, 10, 11h. Every 5<br>minutes between 11<br>and 12h.                                                                                                                                         | University of<br>Lund, Sweden                      | Lund, |

|                                |                                  |                                                             |                                                                                                                                                                     |     |                                                                                                                                                                                                                                                                                                        |                                               |
|--------------------------------|----------------------------------|-------------------------------------------------------------|---------------------------------------------------------------------------------------------------------------------------------------------------------------------|-----|--------------------------------------------------------------------------------------------------------------------------------------------------------------------------------------------------------------------------------------------------------------------------------------------------------|-----------------------------------------------|
|                                |                                  |                                                             | NiQuitin Lozenge 4mg<br>every h for 12h                                                                                                                             |     |                                                                                                                                                                                                                                                                                                        |                                               |
| NICTDP1070<br>(2008-006279-65) | Buccal<br>Chewing gum            | Comparative PK<br>Single dose<br>cross-over                 | Nicorette freshfruit<br>2mg<br>Nicorette freshfruit<br>4mg<br>Nicorette freshfruit<br>6mg                                                                           | 24  | Predose and 5, 10, 15,<br>20, 30, 45, 60 min;<br>1.25, 1.5, 2, 3, 4, 6, 8<br>and 10 h after dosing.                                                                                                                                                                                                    | University of Lund,<br>Lund, Sweden           |
| NICTDP1071<br>(2008-003358-14) | Buccal<br>Chewing gum            | Bioequivalence<br>Single dose<br>cross-over                 | Nicorette classic 2mg<br>Nicorette classic 4mg                                                                                                                      | 85  | Predose and 5, 10, 15,<br>20, 30, 45, 60 min;<br>1.25, 1.5, 2, 3, 4, 6, 8<br>and 10 h after dosing.                                                                                                                                                                                                    | University of Linköping,<br>Linköping, Sweden |
| NICTDP1080<br>(2010-021087-15) | Buccal<br>Chewing gum<br>Lozenge | Comparative PK<br>Single dose<br>cross-over                 | Nicorette freshfruit<br>2mg<br>Nicorette freshfruit<br>4mg<br>Nicorette freshfruit<br>6mg<br>NiQuitin Lozenge 4mg                                                   | 44  | Predose and 2, 4, 6, 8,<br>10, 15, 20, 30, 45, 60<br>min; 1.5, 2, 4, 6, 8, 10,<br>and 12 h after dosing.                                                                                                                                                                                               | University of Lund,<br>Lund, Sweden           |
| NICTDP1081<br>(2010-023026-20) | Buccal<br>Chewing gum<br>Lozenge | Comparative PK<br>Cross-over,<br>repeated dosing<br>for 12h | Nicorette freshfruit<br>4mg/h<br>Nicorette freshfruit<br>4mg/1.5h<br>Nicorette freshfruit<br>6mg/h<br>Nicorette freshfruit<br>6mg/1.5h<br>NiQuitin lozenge<br>4mg/h | 50  | Dosing every h:<br>predose at 0, 1, 2, 3, 4,<br>5, 6, 7, 8, 9, 10, 11 h; 5,<br>10, 15, 20, 30, 40, 50,<br>and 60 min after the<br>last dose.<br>Dosing every 1.5h:<br>predose at 0, 1.5, 3,<br>4.5, 6, 7.5, 9, 10.5 h; 5,<br>10, 15, 20, 30, 40, 50,<br>60, 70, 80, and 90 min<br>after the last dose. | University of Lund,<br>Lund, Sweden           |
| NICTDP1076<br>(2009-012407-26) | Buccal<br>Lozenge                | Bioequivalence<br>Single dose<br>cross-over                 | Nicotine Strongmint<br>Lozenge 2mg<br>Nicorette Strongmint<br>Lozenge 4mg<br>NiQuitin lozenge 2mg<br>NiQuitin lozenge 4mg                                           | 104 | Predose, 7.5, 15, 20, 30,<br>40, 50, 60 min; 1.25,<br>1.5, 2, 3, 4, 6, 8, 10, and<br>12 h after dosing.                                                                                                                                                                                                | University of Lund,<br>Lund, Sweden           |
| A6431107<br>(2006-004904-37)   | Buccal<br>Mouth spray            | Comparative PK<br>Single dose<br>cross-over                 | Mouth spray 1mg<br>Mouth spray 2mg<br>Mouth spray 3mg<br>Mouth spray 4mg                                                                                            | 24  | Predose and 2, 4, 6, 8,<br>10, 13, 16, 20, 30, 45,<br>60 min; 1.25, 1.5, 2, 4,<br>6, and 8 h after dosing.                                                                                                                                                                                             | University of Lund,<br>Lund, Sweden           |
| NICTDP0003<br>(2011-004696-37) | Buccal<br>Mouth spray            | Comparative PK                                              | Mouth spray 2mg                                                                                                                                                     | 33  | Predose and 2, 4, 6, 8,<br>10, 13, 16, 20, 30, 45,                                                                                                                                                                                                                                                     | University of Lund,<br>Lund, Sweden           |

|                                |                    |                                            |                                                                                        |    |                                                                                                    |                            |       |
|--------------------------------|--------------------|--------------------------------------------|----------------------------------------------------------------------------------------|----|----------------------------------------------------------------------------------------------------|----------------------------|-------|
|                                |                    | Single dose cross-over                     |                                                                                        |    | 60 min; 1.25, 1.5, 2, 4, 6, and 8 h after dosing.                                                  |                            |       |
| NICTDP1078<br>(2006-006486-16) | Buccal Mouth spray | Comparative PK Single dose cross-over      | Mouth spray 2mg                                                                        | 30 | Predose and 2, 4, 5, 8, 10, 15, 20, 30, 45, 60 min; 1.5, 2, 4, 6, and 8 h after dosing.            | University of Lund, Sweden | Lund, |
| 95NNIN014                      | Buccal Inhaler     | Bioequivalence Cross-over, 12 hourly doses | Nicorette inhaler 10mg replaced every hour<br>Nicorette inhaler 15mg replaced every 2h | 19 | Predose at 0, 1, 2, 3, 4, 6, 8, 9, 10, 11 h; 10, 20, 30, 40, 50 60 min after the last dose .       | University of Lund, Sweden | Lund, |
| 97NNIN025                      | Buccal Inhaler     | Bioequivalence Cross-over, 12 hourly doses | Nicorette inhaler 10mg replaced every 2h<br>Nicorette inhaler 15mg replaced every 4h   | 21 | Predose at 0, 1, 2, 3, 4, 5, 6, 7, 8, 9, 10, 11 h; 10, 20, 30, 40, 50 60 min after the last dose . | University of Lund, Sweden | Lund, |
| A6431002                       | Buccal Inhaler     | Bioequivalence Single dose cross-over      | Nicorette inhaler 10mg                                                                 | 18 | Predose and 5, 10, 15, 20, 25, 30, 45 min; 1, 1.5, 2, 3, 4, 5, 6, 7, 8 h after dosing.             | University of Lund, Sweden | Lund, |

<sup>a</sup>Only subjects with normal liver function included. <sup>b</sup>Only subjects with normal renal function included.

## Goodness of Fit plots for all models

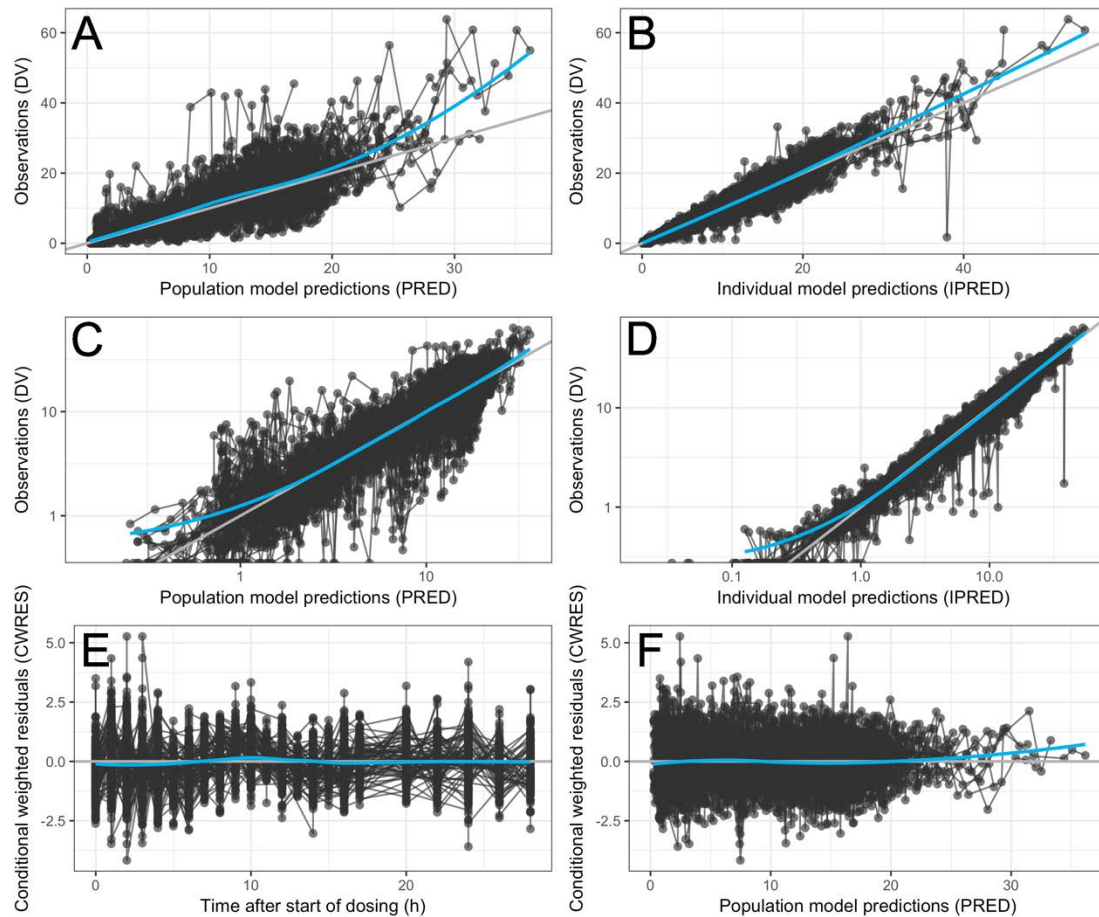

### Supplementary figure 1: Goodness of fit for the transdermal model .

A) Observed vs predicted concentrations, linear scale. B) Observed vs individually predicted concentrations, linear scale. C) Observed vs predicted concentrations, log-log scale. D) Observed vs individually predicted concentrations, log-log scale. E) Conditional weighted residuals vs Time. F) Conditional weighted residuals vs population predictions. Grey line is the line of identity or the zero line, the blue line a smoother. Observations and predictions are in ng/mL.

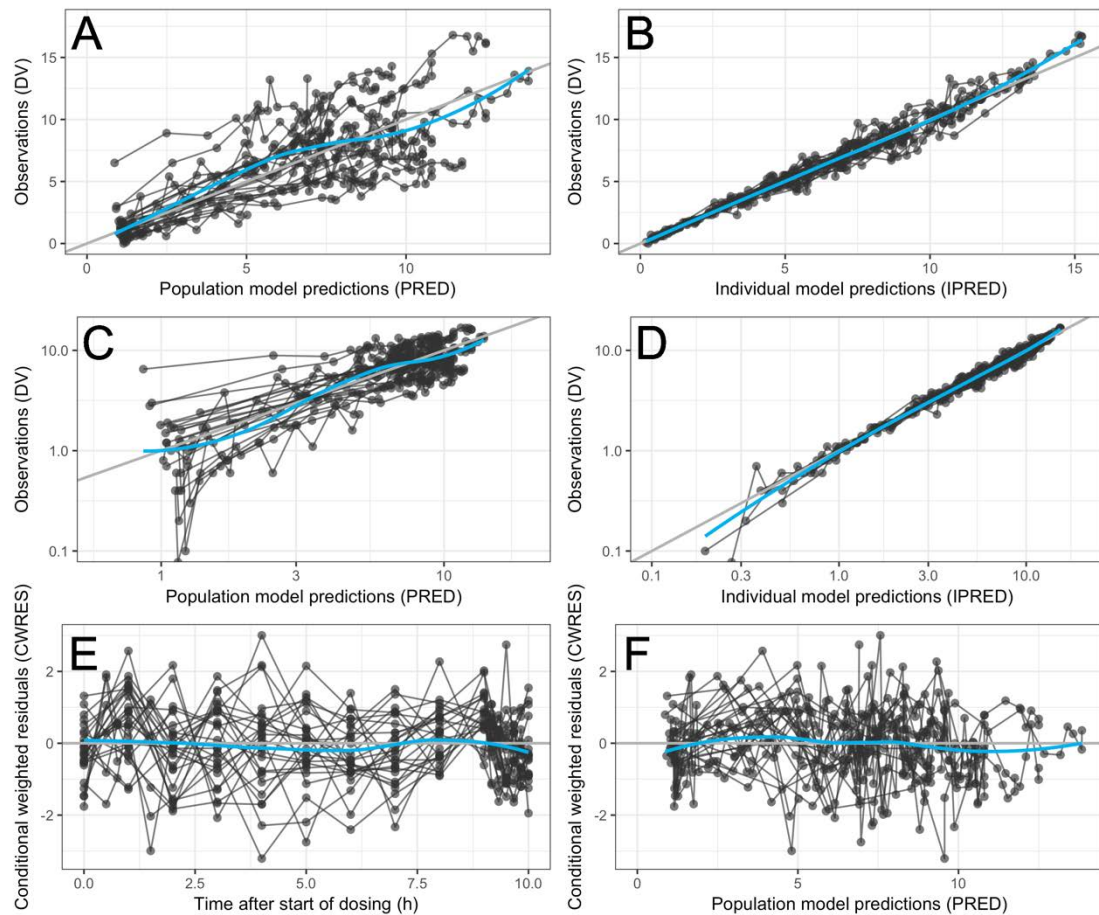

**Supplementary figure 1: Goodness of fit for the oral model**

A) Observed vs population predicted concentrations, linear scale. B) Observed vs individual predicted concentrations, linear scale. C) Observed vs population predicted concentrations, log scale. D) Observed vs individual predicted concentrations, log- scale. E) Conditional weighted residuals vs Time. F) Conditional weighted residuals vs population predictions. Grey line is the line of identity, blue line a smooth. Observations and predictions are in ng/mL.



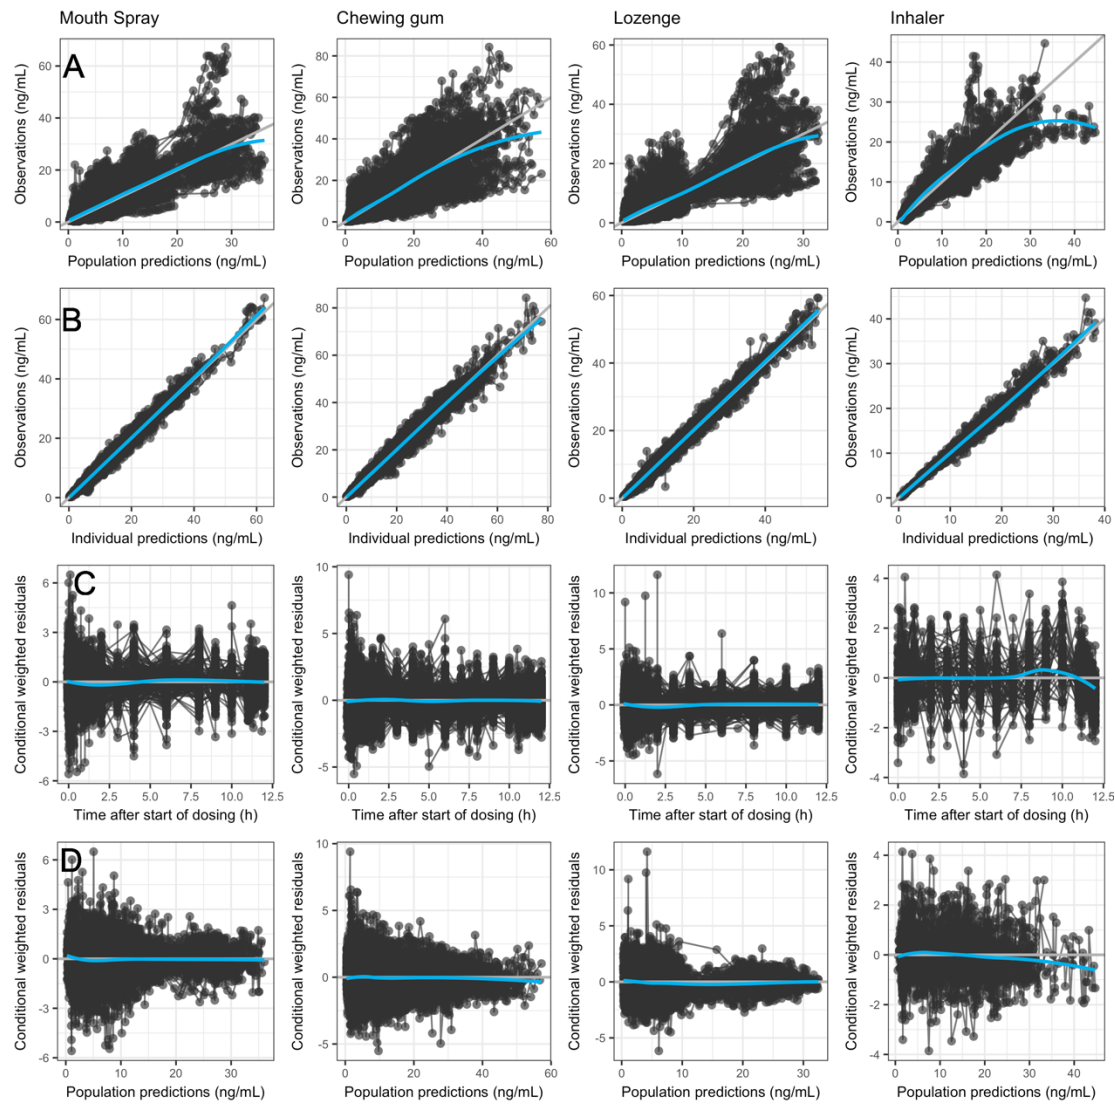

**Supplementary figure 3: Goodness of fit for the buccal models.**

From left to right: Mouth spray, chewing gum, lozenge, inhaler. A) Observed vs population predicted concentrations. B) Observed vs individual predicted concentrations. C) Conditional weighted residuals vs Time. D) Conditional weighted residuals vs population predictions. Grey line is the line of identity, blue line a smooth.
